# Supplementary material for: Cohort profile: the Swedish study of SUDden cardiac Death in the Young (SUDDY) 2000–2010: a complete nationwide cohort of SCDs
Source: HighWire-hosted journal article supplement (doi:10.1136/bmjopen-2021-055557), 2022-05-01
Supplement: bmjopen-2021-055557supp001_data_supplement.pdf [file bmjopen-2021-055557supp001_data_supplement.pdf]

Supplementary table 1. Number of parents of cases and controls stratified on diagnosis group.

|                |                | SIDS | SADS         | CAD         | Myocarditis | Cardiomyopathies | TAD         | Congenital Malformation | Total       |              |
|----------------|----------------|------|--------------|-------------|-------------|------------------|-------------|-------------------------|-------------|--------------|
| cases          | N              | 234  | 167          | 163         | 71          | 137              | 53          | 78                      | 903         |              |
|                | info on father | no   | 27 (11.5%)   | 8 (4.8%)    | 16 (9.8%)   | 3 (4.2%)         | 4 (2.9%)    | 2 (3.8%)                | 4 (5.1%)    | 64 (7.1%)    |
|                |                | yes  | 207 (88.5%)  | 159 (95.2%) | 147 (90.2%) | 68 (95.8%)       | 133 (97.1%) | 51 (96.2%)              | 74 (94.9%)  | 839 (92.9%)  |
|                | info on mother | no   | 0 (0%)       | 5 (3%)      | 11 (6.7%)   | 3 (4.2%)         | 2 (1.5%)    | 0 (0%)                  | 4 (5.1%)    | 25 (2.8%)    |
|                |                | yes  | 234 (100%)   | 162 (97%)   | 152 (93.3%) | 68 (95.8%)       | 135 (98.5%) | 53 (100%)               | 74 (94.9%)  | 878 (97.2%)  |
|                | controls       | N    | 1168         | 835         | 815         | 355              | 685         | 265                     | 390         | 4513         |
| info on father |                | no   | 8 (0.7%)     | 76 (9.1%)   | 77 (9.4%)   | 22 (6.2%)        | 51 (7.4%)   | 23 (8.7%)               | 29 (7.4%)   | 286 (6.3%)   |
|                |                | yes  | 1160 (99.3%) | 759 (90.9%) | 738 (90.6%) | 333 (93.8%)      | 634 (92.6%) | 242 (91.3%)             | 361 (92.6%) | 4227 (93.7%) |
| info on mother |                | no   | 0 (0%)       | 63 (7.5%)   | 65 (8%)     | 14 (3.9%)        | 40 (5.8%)   | 21 (7.9%)               | 26 (6.7%)   | 229 (5.1%)   |
|                |                | yes  | 1168 (100%)  | 772 (92.5%) | 750 (92%)   | 341 (96.1%)      | 645 (94.2%) | 244 (92.1%)             | 364 (93.3%) | 4284 (94.9%) |

SIDS = Sudden Infant Death Syndrome, SADS = Sudden Arrhythmic Death Syndrome, CAD = Coronary Artery Disease, TAD = Thoracic Aortic Dissection.

Supplementary table 2. Number of individuals born in Sweden and abroad included in the SUDDY cohort.

|                                                        | <b>Case (%)</b> | <b>Control (%)</b> | <b>Total (%)</b> |
|--------------------------------------------------------|-----------------|--------------------|------------------|
| N                                                      | 903             | 4513               | 5416             |
| <b>Born in Sweden or abroad</b>                        |                 |                    |                  |
| Abroad                                                 | 64 (7.1)        | 435 (9.6)          | 499 (9.2)        |
| In Sweden, both parents<br>born abroad                 | 59 (6.5)        | 300 (6.6)          | 359 (6.6)        |
| In Sweden, one parent born<br>in Sweden and one abroad | 81 (9)          | 404 (9)            | 485 (9)          |
| In Sweden, both parents<br>born in Sweden              | 699 (77.4)      | 3374 (74.8)        | 4073 (75.2)      |
| Missing                                                | 0               | 0                  | 0                |
