# Supplementary material for: Cohort profile: the Swedish study of SUDden cardiac Death in the Young (SUDDY) 2000–2010: a complete nationwide cohort of SCDs
Source: HighWire-hosted journal article supplement (doi:10.1136/bmjopen-2021-055557), 2022-05-01

**Supplementary Figure 1.** Distribution of the reference dates for cases, controls and parents in the SUDDY cohort.

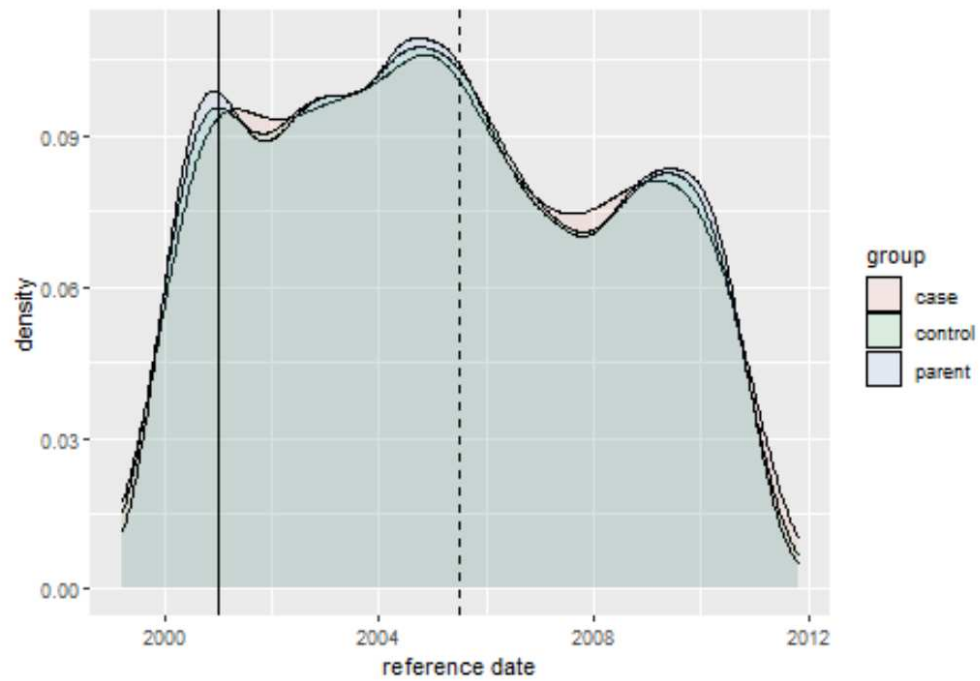

Supplement: bmjopen-2021-055557supp002_data_supplement.pdf [file bmjopen-2021-055557supp002_data_supplement.pdf]
